# Supplementary material
Source: publisher figshare collection journal article supplement (https://gsapubs.figshare.com/articles/dataset/_/12541109)
Supplement: Supplementary file 1 [file 1]

## Sheet: Sheet1
	Table S1. ELECTRON MICROPROBE-DERIVED REPRESENTATIVE MINERAL COMPOSITIONS FOR ALL STUDIED SAMPLES (WT% OXIDE AND CATIONS PER FORMULA UNIT)
Unit	Zas Unit
Sample	TLN25												TLN26								TLN54
Mineral	Actinolite	Barrosite	Glaucophane	Biotite	Chlorite	Epidote	Muscovite	Paragonite	Albite	Plagioclase	Talc		Chlorite	Phengite	Muscovite	Paragonite	Albite	Glaucophane	Rutile		Glaucophane	Biotite	Chlorite	ilhem	Phengite	Muscovite	Paragonite	Albite
Location	Matrix	Matrix	Inc in Ep	Matrix	Matrix	Matrix	Matrix	Inc in Ep	Matrix	Matrix	Matrix		Matrix	Matrix	Matrix	Matrix	Matrix	Matrix	Matrix		Matrix	Matrix	Matrix	Matrix	Matrix	Matrix	Matrix	Matrix
SiO2	55.54	52.14	60.42	40.91	26.55	39.73	48.01	47.86	67.6	62.3	63.05		24.84	50.55	49.36	47.2	68.08	54.19	0		55.94	45.18	25.74	0.28	50.1	50.53	48.22	68.59
TiO2	0.05	0	0.15	0.37	0.05	0.37	0.17	0.05	0.05	0	0.2		0.23	0.13	0.4	0.28	0	0	98.743		0.13	0.13	0	52.71	0.52	0.28	0.1	0.07
Al2O3	1.11	17.53	9.05	13.87	20.35	23.66	26.6	41.32	18.52	20.73	0.25		20.27	26.28	26.7	33.35	19.59	39.04	0.321212		10.71	15.1	19.39	0.06	26.49	27.68	37.73	18.8
FeO	10.58	10.47	12.92	13.88	19.21	10.36	3.98	0.58	0.26	2.43	6.83		28.2	3.25	3.92	1.31	0	0.33	0.694714		15.48	16.12	28.89	43.02	3.53	2.96	0.14	0.45
MnO	0.37	0.1	0.14	0.09	0.04	0	0	0.28	0	0.09	0		0	0	0	0.06	0.05	0.15	0.0258247		0.07	0.05	0.27	1.74	0	0	0.06	0
MgO	17.68	6.4	10	17.81	19.52	0.15	2.72	0	0	0.45	26.5		12.4	2.69	2.07	1.13	0.33	0.12	0.033166		6.65	9.98	12.37	0.15	1.89	2.85	0.63	0.17
CaO	12.47	9	0.32	0.5	0	22.98	0.22	0.25	0.08	5.65	0.14		0.01	0.32	0.06	0.15	0.18	0.22	0		0.24	0.24	0	0.03	0.14	0.27	0.07	0.18
Na2O	0.98	4.17	7.4	0.03	0	0	0.36	7.91	11.94	8.06	0.32		0.11	0.42	0.44	1.13	11.2	7.56	0.148278		7.03	0	0	0.2	0.36	0.39	7.33	11.27
K2O	0	0	0.07	9.02	0	0.06	10.17	0.67	0.1	0.1	0		0.01	10.43	10.06	9.56	0.07	0.53	0.0120461		0.03	7.43	0	0.18	10.29	10.28	0.4	0.05
Total	98.78	99.81	100.47	96.48	85.72	97.31	92.23	98.92	98.55	99.81	97.29		86.07	94.07	93.01	94.17	99.5	102.14	99.9782		96.28	94.23	86.66	98.37	93.32	95.24	94.68	99.58
Si	7.762	7.097	8.075	2.94	2.576	3.004	3.149	2.802	2.848	2.653	3.802		2.716	3.435	3.398	3.089	2.98	6.692	0		7.973	3.276	2.78	0.007	3.408	3.36	3.027	2.993
Ti	0.005	0	0.015	0.02	0.004	0.021	0.008	0.002	0.002	0	0.009		0.019	0.007	0.021	0.014	0	0	0.990848		0.014	0.007	0	0.999	0.027	0.014	0	0.002
Al	0.183	2.813	1.426	1.175	2.328	2.109	2.057	2.852	0.92	1.041	0.018		2.613	2.105	2.167	2.573	1.011	5.684	0.00505272		1.8	1.291	2.469	0.002	2.124	2.17	2.911	0.967
Fe3+	0.153	0.149	0.146	0.078	0.642	0.5	0.434	0.387	0.279	0.282	0.399		0	0	0	0.179	0.01	0.028	0		0.099	0.05	0.075	0.017	0.047	0.046	0.046	0.03
Fe2+	1.237	1.192	1.444	0.834	1.559	0.655	0.218	0.028	0.009	0.087	0.344		2.578	0.185	0.226	0.072	0	0.034	0.00775224		1.746	0.978	2.609	0.907	0.201	0.165	0.03	0.016
Mn	0.044	0.012	0.016	0.005	0.003	0	0	0.014	0	0.003	0		0	0	0	0.003	0.002	0.016	0.000291872		0.008	0.003	0.025	0.037	0	0	0	0
Mg	3.682	1.298	1.992	1.907	2.823	0.017	0.266	0	0	0.029	2.381		2.02	0.272	0.212	0.11	0.022	0.022	0.000659509		1.413	1.079	1.991	0.006	0.192	0.282	0	0.011
Ca	1.867	1.313	0.046	0.038	0	1.862	0.015	0.016	0.004	0.258	0.009		0.001	0.023	0.004	0.011	0.008	0.029	0		0.037	0.019	0	0.001	0.01	0.019	0.008	0.008
Na	0.266	1.101	1.918	0.004	0	0	0.046	0.898	0.975	0.665	0.037		0.023	0.055	0.059	0.143	0.951	1.81	0.00383608		1.943	0	0	0.01	0.047	0.05	0.897	0.953
K	0	0	0.012	0.827	0	0.006	0.851	0.05	0.005	0.005	0		0.001	0.904	0.883	0.798	0.004	0.084	0.000205057		0.005	0.687	0	0.006	0.893	0.872	0.047	0.003
Sum	15.199	14.975	15.09	7.828	9.935	8.174	7.044	7.049	5.042	5.023	6.999		9.971	6.986	6.97	6.992	4.988	14.399	1.00865		15.038	7.39	9.949	1.992	6.949	6.978	6.966	4.983
Oxygen	23	23	23	11	14	12.5	11	11	8	8	11		14	11	11	22	8	23	2		23	11	14	3	11	11	11	8
Unit	Koronos Unit
Sample	TL67																					TLN16							TLN21																	TLN22
Mineral	Biotite	Biotite	Biotite	Muscovite	Muscovite	Muscovite	Plagioclase	Garnet	Garnet	Garnet	Garnet	Garnet	Garnet	Garnet	Garnet	K-feldspar	Chlorite	Kyanite	Sphene	Plagioclase		Biotite	Biotite	Garnet	Garnet	Garnet	Plagioclase		Biotite	Biotite	Chlorite	Garnet	Garnet	Garnet	Garnet	Garnet	Garnet	Garnet	Garnet	Garnet	Muscovite	Muscovite	Plagioclase	Albite		Biotite	Biotite	Biotite	Garnet
Location	Matrix	with Ms	with Ky	with Grt	Matrix	with Grt	Matrix	Core	Core	Core	Inner Rim	Inner Rim	Rim	Rim	Outer Rim	with Grt	Matrix	Enclave	Matrix	Matrix		Matrix	Matrix	Rim	Inner Rim	Core	Matrix		Matrix	Matrix	Matrix	Outer Rim	Inner Rim	Intermediate	Core	Core	Intermediate	Rim	Rim	Core	Matrix	in Grt	Matrix	Matrix		Matrix	with Ky	with Grt	Inner Rim
SiO2	35.99	36.3245	34.8518	45.13	45.6702	45.13	61.4115	37.3111	37.14	36.7976	37.3539	37.846	37.6534	37.9957	37.9529	65.34	30.1305	36.03	31.2307	58.6195		35.6852	35.4498	38.0171	38.2738	38.2952	59.8176		35.5568	35.1931	27.042	36.819	38.1455	37.9101	37.632	36.7335	37.7176	38.2097	37.8032	36.9046	45.3338	45.1413	61.9784	69.3165		36.7335	36.113	36.113	38.4022
TiO2	4.36	3.74563	3.42784	0.58	1.32548	0.58	0	0.166852	0	0.233593	0.0667408	0.116796	0.133482	0.200222	0.150167	0.18	1.8622	0.0911808	31.6354	0		3.45383	4.0545	0.0333704	0.216907	0	0		3.98776	3.98776	0.233593	0.133482	0.166852	0	0.183537	0.083426	0.283648	0.0166852	0.0667408	0	1.48498	0.951056	0.283648	0		2.71969	2.86985	2.86985	0
Al2O3	18.08	19.4208	19.0409	35.11	33.286	35.11	24.3314	20.4631	20.5576	20.7276	20.6709	20.2552	20.6898	20.8032	20.7276	18.64	36.5669	62.4472	6.62019	25.6781		18.1012	18.5169	21.6724	20.7843	20.7276	24.8089		18.2335	18.0634	19.8207	20.7276	20.6709	20.8977	20.3875	20.9732	20.3686	20.8788	20.6331	20.841	34.6531	34.2185	22.7305	19.6695		17.9123	19.3672	19.3672	20.5954
FeO	18.03	19.6215	18.8831	1.89117	1.71238	1.15	0.0282678	31.9697	30.4516	31.4294	30.9405	28.5862	31.1849	30.2715	30.8504	0.01	11.8272	0.768666	0.481168	0.128651		15.1036	14.2545	25.7687	25.9103	25.9103	0.167246		19.645	19.1304	28.3032	30.9276	32.5744	32.0984	33.0118	32.0212	31.1721	31.9054	32.1755	33.565	1.31224	1.14499	0.270167	0.218706		17.4579	16.6345	16.6345	31.0434
MnO	0.23	0.19351	0.144203	0	0	0.03	0.00951265	2.45335	2.00142	2.02724	2.28549	3.20227	2.14345	2.11763	3.42178	0	0.119245	0.0191262	0	0		0.0903866	0.0129124	6.2625	5.3199	5.51358	0		0.21951	0.503583	0.54232	6.12047	3.5509	1.91103	1.83356	3.17644	1.78191	3.04732	3.62838	3.26683	0.0516495	0	0.21951	0		0.400284	0	0	4.10613
MgO	9.69	9.39736	7.54281	0.679903	1.19302	0.68	0	2.12262	2.52062	2.7362	3.5156	3.49901	3.48243	3.2171	3.38293	0	4.10606	0	0	0		11.4754	10.9282	3.68143	4.14575	3.66484	0.082915		8.12567	8.17542	11.691	2.57037	3.6151	4.1955	3.78093	3.59851	4.16233	3.56535	3.64826	2.98494	0.746235	0.729652	0.033166	0.049749		11.4091	10.58	10.58	3.9965
CaO	0.04	0.0070429	0	0.0839533	0.011691	0	5.5762	5.26107	6.25452	5.79278	5.00921	5.59689	5.69483	5.58289	3.90383	0	0.0780421	0.0110836	28.9035	7.31793		0.0979455	0	5.35902	6.15657	5.68084	7.08006		0	0.181899	0.0279844	2.08484	2.11282	3.88984	3.19023	2.54658	3.42809	2.21077	1.81899	2.58856	0.12593	0	5.79278	0.713603		0.0979455	0	0	2.92437
Na2O	0.09	0.065024	0.149668	0.741388	0.10878	0.26	8.33632	0.215676	0.175237	0.0404393	0	0.148278	0.188717	0.0539191	0.107838	0.4	0.0297366	0	0.0404144	7.99351		0.404393	0.377434	0	0.188717	0.336994	7.98003		0.188717	0.323515	0	0.59311	0.0808786	0	0.0808786	0	0.134798	0.269595	0	0.242636	0.0269595	0.62007	8.62706	11.5791		0	0	0	0.134798
K2O	10.25	10.7525	9.39146	10.5886	10.6055	10.6	0.220159	0.0481846	0	0	0.0361384	0	0.0240923	0.0361384	0.0240923	16.71	5.12495	0.142029	0.370606	0.108415		9.20325	9.48031	0.0361384	0	0	0.168646		9.74533	9.45622	0.0240923	0.0722768	0	0.0602307	0.144554	0.0963691	0	0	0	0.0120461	10.7572	10.6488	0.180692	0.0240923		8.75754	9.34781	9.34781	0
Total	96.76	99.5278	93.4318	94.805	93.913	93.54	99.9133	100.012	99.1009	99.7849	99.8785	99.2506	101.195	100.278	100.522	101.28	89.8449	99.5092	99.2819	99.8461		93.6152	93.0746	100.831	100.996	100.129	100.105		95.7023	95.0153	87.6848	100.049	100.917	100.963	100.245	99.2292	99.0491	100.104	99.7742	100.406	94.4921	93.4544	100.116	101.571		95.4882	94.9124	94.9124	101.203
Si	2.695	2.661	2.703	3.039	3.095	3.06	2.728	2.995	2.991	2.95	2.98	3.029	2.961	3.019	3.016	2.987	2.865	0.982334	1.01795	2.628		2.712	2.701	2.99	2.994	3.025	2.669		2.707	2.698	2.888	2.954	3.03	2.987	3	2.962	3.028	3.045	3.033	2.952	3.063	3.119	2.75878	2.98651		2.751	2.713	2.713	3.028
Ti	0.246	0.207	0.2	0.029	0.068	0.03	0	0.01	0	0.014	0.004	0.007	0.008	0.012	0.009	0.006	0.133	0.00186962	0.775483	0		0.197	0.232	0.002	0.013	0	0		0.228	0.23	0.018	0.008	0.01	0	0.011	0.005	0.017	0.001	0.004	0	0.086	0.086	0.00949537	0		0.153	0.162	0.162	0
Al	1.596	1.677	1.741	2.787	2.66	2.807	1.274	1.936	1.952	1.959	1.945	1.912	1.919	1.948	1.942	1.005	4.1	2.00722	0.254391	1.357		1.622	1.664	2.009	1.916	1.931	1.305		1.636	1.632	2.496	1.961	1.935	1.942	1.916	1.994	1.928	1.962	1.951	1.966	2.715	2.618	1.19281	0.999098		1.581	1.715	1.715	1.915
Fe3+	0	0	0	0	0	0	0.001	0.092	0.094	0.118	0.09	0.038	0.174	0.003	0.026	0	0	0	0	0.005		0	0	0.011	0.099	0.071	0.006		0	0	0	0.213	0	0.089	0.089	0.083	0.002	0	0	0.169	0	0	0	0		0	0	0	0.05
Fe2+	1.129	1.202	1.225	0.106	0.097	0.065	0	2.054	1.957	1.989	1.975	1.875	1.877	2.008	2.025	0	0.941	0.017527	0.0131164	0		0.96	0.908	1.684	1.596	1.641	0		1.25	1.227	2.528	1.862	2.163	2.026	2.112	2.076	2.091	2.127	2.159	2.077	0.079	0.065	0.0100573	0.00788068		1.094	1.045	1.045	1.997
Mn	0.015	0.012	0.009	0	0	0.002	0	0.167	0.136	0.138	0.155	0.217	0.143	0.143	0.23	0	0.01	0.000441706	0	0		0.006	0.001	0.417	0.353	0.369	0		0.014	0.032	0.049	0.416	0.239	0.127	0.124	0.217	0.121	0.206	0.247	0.222	0.014	0	0.00827642	0		0.025	0	0	0.274
Mg	1.081	1.026	0.872	0.068	0.12	0.069	0	0.254	0.302	0.327	0.419	0.417	0.408	0.381	0.4	0	0.582	0	0	0		1.3	1.241	0.431	0.484	0.431	0.005		0.922	0.935	1.861	0.307	0.428	0.493	0.449	0.433	0.498	0.424	0.436	0.355	0.051	0.107	0.00220015	0.00319443		1.274	1.184	1.184	0.47
Ca	0.003	0.001	0	0.006	0.001	0	0.266	0.452	0.539	0.497	0.428	0.48	0.48	0.475	0.332	0	0.008	0.000323794	1.00946	0.352		0.008	0	0.452	0.516	0.481	0.339		0	0.015	0.003	0.179	0.18	0.328	0.273	0.22	0.295	0.189	0.156	0.222	0.004	0	0.276285	0.0329441		0.008	0	0	0.247
Na	0.013	0.01	0.023	0.097	0.014	0.034	0.718	0.034	0.028	0.006	0	0.023	0.029	0.008	0.017	0.035	0.006	0	0.00255415	0.694		0.059	0.056	0	0.029	0.052	0.69		0.028	0.048	0	0.092	0.012	0	0.012	0	0.02	0.042	0	0.037	0.051	0.063	0.74457	0.967318		0	0	0	0.02
K	0.979	1.005	0.929	0.91	0.917	0.917	0.012	0.005	0	0	0.004	0	0.002	0.004	0.002	0.975	0.621	0.00494029	0.0154112	0.006		0.892	0.921	0.004	0	0	0.01		0.947	0.925	0.003	0.007	0	0.006	0.014	0.01	0	0	0	0.001	0.909	0.916	0.0102612	0.0013243		0.837	0.896	0.896	0
Sum	7.757	7.801	7.702	7.042	6.972	6.984	4.999	7.999	7.999	7.998	8	7.998	8.001	8.001	7.999	5.008	9.266	3.01466	3.08836	5.042		7.756	7.724	8	8	8.001	5.024		7.732	7.742	9.846	7.999	7.997	7.998	8	8	8	7.996	7.986	8.001	6.972	6.974	5.01274	4.99827		7.723	7.715	7.715	8.001
Oxygen	11	11	11	11	11	11	8	12	12	12	12	12	12	12	12	8	14	5	5	8		11	11	12	12	12	8		11	11	14	12	12	12	12	12	12	12	12	12	11	11	8	8		11	11	11	12
Unit	Core Unit
Sample	TL15																			TL59																			TL66
Mineral	Biotite	Biotite	Biotite	Garnet	Garnet	Garnet	Garnet	Garnet	Garnet	Garnet	Garnet	Garnet	Muscovite	Muscovite	Muscovite	Muscovite	Plagioclase	Plagioclase		Biotite	Biotite	Biotite	Chlorite	Garnet	Garnet	Garnet	Garnet	Garnet	Garnet	Garnet	ilhem	Muscovite	Muscovite	Muscovite	Muscovite	Plagioclase	Plagioclase		Biotite	Biotite	Biotite	Muscovite	Muscovite	Muscovite	Plagioclase	Plagioclase	Garnet	Garnet	Garnet
Location	Leucosoome	Melanosome	Melanosome	Outer Rim	Intermediate	Core	Outer Rim	Inner Rim	Core	Core	Inner Rim	Outer Rim	With Bt	Primary	Secondary	Primary	Leucosome	Melanosome		Matrix	Matrix	Matrix	Matrix	Core	Inner Rim	Inner Rim	Intermediate	Outer Rim	Outer Core	Core	Matrix	Matrix	Matrix	Inc in grt	matrix	Matrix	Matrix		with Sill	Paleosome	Melanosome	Secondary	Primary	Secondary	Leucosome	with Grt	Outer Rim	Inner Rim	Inner Rim
SiO2	35.8615	35.4284	35.0006	36.6424	37.8887	37.0758	37.4181	37.2041	37.3325	37.7176	38.6375	37.6962	45.9832	47.0668	45.8045	47.5588	62.4918	59.4753		37.3111	37.6534	37.739	34.6796	38.231	38.5092	38.1241	38.2952	37.5892	38.2738	37.4181	0.192546	46.4249	46.8528	47.6658	45.1413	64.8666	62.9839		34.8518	35.0708	35.9847	46.8742	46.7459	45.7395	56.9494	61.6575	37.1186	37.4823	37.2683
TiO2	3.07972	3.33704	3.43715	0.0316474	0.0166852	0	0.116796	0.083426	0	0	0	0	1.17206	1.36819	0.800889	1.40156	0	0		3.05339	3.00333	2.8198	2.00222	0.166852	0	0.0166852	0	0.183537	0.0166852	0	47.6863	0.700778	1.15128	1.06785	0.4505	0.083426	0.0500556		3.42784	3.40361	3.42046	1.43493	1.45161	1.22277	0	0.100111	0	0.0166852	0.200222
Al2O3	18.6654	18.7437	18.8381	20.6684	21.2567	20.5954	20.841	20.7465	21.0488	20.7843	20.0663	20.7654	34.1735	33.6706	34.483	33.2171	22.9572	25.0167		17.3077	17.8178	17.062	18.5358	20.841	21.3511	21.0866	20.9544	20.652	20.5198	20.9166	0.170053	32.6125	31.4032	30.723	32.9148	22.4093	23.5052		19.0409	18.3581	17.969	34.1807	33.1226	33.3414	29.8356	24.8656	20.5765	20.7276	20.3308
FeO	19.3428	19.1561	20.0824	33.3898	31.6867	31.558	33.5135	32.3814	33.2305	33.6422	31.1206	33.4363	1.30176	1.54381	1.37656	1.45375	0.0900555	0		19.1175	18.9631	19.8894	14.7434	29.8598	32.5358	32.227	32.2913	30.7218	31.5709	31.3779	49.7106	3.48643	3.65368	3.37065	3.7952	0.0385952	0.0257301		18.8831	21.0819	20.7385	2.14847	1.92976	1.82606	0.0667191	0.0385952	32.9217	32.1884	33.8995
MnO	0.080401	0.232423	0.103299	3.02971	1.75608	1.84647	2.18219	1.58822	1.47201	2.32423	1.26541	2.11763	0.0486409	0.0645619	0.0645619	0.142036	0.322809	0		0.258247	0.426108	0.206598	0.348634	2.37588	1.78191	2.56956	2.02724	5.20369	2.59539	2.45335	1.5624	0	0.0774742	0	0.0258247	0	0.0387371		0.144203	0.157985	0.0645619	0	0	0	0	0	4.02866	4.81632	1.769
MgO	9.20121	9.18699	8.82216	3.20873	3.83067	2.60353	3.63168	3.81409	3.34977	3.3166	4.494	4.16233	0.928092	0.878899	0.82915	0.912065	0.116081	0.116081		8.52367	7.57843	8.40758	6.43421	2.96836	3.36635	3.08444	2.91861	2.40454	2.42112	1.64172	0.049749	0.630154	0.99498	1.19398	0.613571	0	0		7.54281	8.08674	7.64477	0.878899	1.12764	0.947987	0	0	2.93519	3.23369	3.78093
CaO	0.0186978	0.0139922	0.153914	2.13134	4.18367	6.08661	2.43465	3.70794	3.10627	2.74247	3.55402	2.77046	0.0170995	0	0	0	4.60344	6.98212		0.195891	0.0559689	0.237868	0	6.1146	4.18367	3.72193	4.09972	3.21821	5.2051	5.91871	0	0.0139922	0.0139922	0	0	3.28817	4.95324		0	0.0515408	0.0139922	0	0	0.00162899	6.64104	6.22654	2.25275	2.54658	2.23875
Na2O	0.0679269	0.471792	0.485272	0	0.175237	0	0	0	0.121318	0	0.310035	0	0.571029	0.444833	1.02446	0.660509	9.50324	7.69695		0.377434	0.188717	0.525711	0.390913	0.134798	0.148278	0	0.175237	0.202197	0.0404393	0.0808786	0	0.62007	0.539191	0.498752	0.673989	9.97503	9.12581		0.149668	0.314238	0.417873	0.660509	0.498752	0.539955	6.80392	7.65651	0.134798	0.0404393	0
K2O	9.57673	9.3719	9.07074	0	0.084323	0.144554	0.0120461	0.0120461	0.0963691	0	0.228877	0	10.418	10.0585	10.1669	10.1429	0.120461	0.0722768		9.01051	8.34798	7.95045	8.26365	0.0240923	0	0	0	0.084323	0	0.0240923	0.084323	10.5404	10.5163	10.3356	10.2754	0.192738	0.240923		9.39146	9.64171	9.13097	10.3476	10.6247	10.4149	0.35935	0.180692	0.0963691	0	0
Total	95.8944	95.9423	95.9936	99.102	100.879	99.9103	100.15	99.5378	99.7575	100.527	99.6768	100.948	94.6133	95.0961	94.5501	95.4887	100.205	99.3594		95.16	94.04	94.85	85.39	100.73	101.92	100.83	100.77	100.29	100.65	99.84	100.4	95.02	95.19	94.86	93.95	100.86	100.93		93.4318	96.1666	95.3848	96.5254	95.5009	94.0342	100.656	100.725	100.065	101.052	99.4875
Si	2.711	2.681	2.656	2.973	2.983	2.969	2.994	2.981	2.99	3.012	3.067	2.983	3.086	3.134	3.078	3.156	2.772	2.668		2.829	2.868	2.861	3.65	3.023	3.015	3.024	3.038	3.017	3.048	3.013	0.005	3.137	3.166	3.218	3.09	2.838	2.768		2.703	2.678	2.75	3.093	3.12	3.098	2.521	2.715	2.985	2.982	3.003
Ti	0.175	0.19	0.196	0.002	0.001	0	0.007	0.005	0	0	0	0	0.059	0.069	0.04	0.07	0	0		0.174	0.172	0.161	0.158	0.01	0	0.001	0	0.011	0.001	0	0.904	0.036	0.058	0.054	0.023	0.003	0.002		0.2	0.195	0.197	0.071	0.073	0.062	0	0.003	0	0.001	0.012
Al	1.663	1.672	1.686	1.977	1.974	1.945	1.966	1.961	1.988	1.956	1.878	1.937	2.704	2.643	2.732	2.599	1.201	1.323		1.548	1.6	1.525	2.301	1.943	1.97	1.972	1.959	1.954	1.926	1.986	0.005	2.598	2.501	2.445	2.656	1.156	1.218		1.741	1.653	1.619	2.659	2.606	2.663	1.558	1.291	1.951	1.944	1.931
Fe3+	0	0	0	0.073	0.093	0.131	0.032	0.068	0.06	0.021	0.059	0.097	0	0	0	0	0.003	0		0	0	0	0	0.013	0.023	0	0	0.03	0	0.004	0.179	0	0	0	0.032	0.001	0.001		0	0	0	0	0	0	0.003	0.001	0.111	0.096	0.037
Fe2+	1.223	1.212	1.275	2.193	1.994	1.982	2.21	2.103	2.166	2.225	2.006	2.115	0.073	0.086	0.078	0.08	0	0		1.213	1.208	1.261	1.298	1.962	2.107	2.138	2.142	2.032	2.103	2.109	0.869	0.197	0.206	0.19	0.186	0	0		1.225	1.346	1.326	0.119	0.108	0.104	0	0	2.103	2.045	2.247
Mn	0.005	0.015	0.006	0.208	0.117	0.125	0.148	0.108	0.1	0.157	0.085	0.142	0.003	0.003	0.003	0.008	0.012	0		0.017	0.028	0.013	0.031	0.159	0.118	0.173	0.136	0.353	0.175	0.167	0.033	0	0.005	0	0.002	0	0.001		0.009	0.01	0.004	0	0	0	0	0	0.274	0.325	0.121
Mg	1.037	1.036	0.998	0.388	0.449	0.31	0.433	0.455	0.4	0.395	0.531	0.491	0.093	0.087	0.083	0.09	0.008	0.008		0.963	0.86	0.95	1.009	0.35	0.393	0.364	0.345	0.287	0.287	0.197	0.002	0.063	0.1	0.12	0.062	0	0		0.872	0.921	0.87	0.087	0.112	0.096	0	0	0.352	0.383	0.454
Ca	0.002	0.001	0.012	0.185	0.353	0.523	0.208	0.319	0.267	0.234	0.302	0.235	0.001	0	0	0	0.219	0.335		0.016	0.005	0.019	0	0.518	0.351	0.316	0.348	0.277	0.445	0.511	0	0.001	0.001	0	0	0.154	0.233		0	0.004	0.001	0	0	0	0.315	0.294	0.194	0.217	0.193
Na	0.01	0.069	0.072	0	0.027	0	0	0	0.019	0	0.048	0	0.074	0.057	0.133	0.085	0.817	0.67		0.056	0.028	0.078	0.08	0.02	0.023	0	0.028	0.031	0.006	0.012	0	0.081	0.071	0.065	0.089	0.847	0.778		0.023	0.046	0.062	0.084	0.065	0.071	0.584	0.654	0.02	0.006	0
K	0.924	0.904	0.878	0	0.008	0.014	0.001	0.001	0.01	0	0.023	0	0.892	0.854	0.872	0.858	0.007	0.004		0.872	0.811	0.769	1.109	0.002	0	0	0	0.008	0	0.002	0.003	0.909	0.907	0.891	0.898	0.011	0.013		0.929	0.939	0.89	0.871	0.904	0.9	0.02	0.01	0.01	0	0
Sum	7.75	7.78	7.779	7.999	7.999	7.999	7.999	8.001	8	8	7.999	8	6.985	6.933	7.019	6.946	5.039	5.008		7.688	7.58	7.637	9.636	8	8	7.988	7.996	8	7.991	8.001	2	7.022	7.015	6.983	7.038	5.01	5.014		7.702	7.792	7.719	6.984	6.988	6.994	5.001	4.968	8	7.999	7.998
Oxygen	11	11	11	12	12	12	12	12	12	12	12	12	11	11	11	11	8	8		11	11	11	14	12	12	12	12	12	12	12	3	11	11	11	11	8	8		11	11	11	11	11	11	8	8	12	12	12
[truncated: 53 more columns]
